# Supplementary material for: A DFT study of adsorption of imidazole, triazole, and tetrazole on oxidized copper surfaces: Cu2O(111) and Cu2O(111)-w/o-CuCUS
Source: Royal Society of Chemistry journal article supplement (doi:10.1039/c5cp03647j), 2015-01-01
Supplement: c5cp03647j1.pdf [file c5cp03647j1.pdf]

Cite this: DOI: 10.1039/xxxxxxxxxx

## A DFT study of adsorption of imidazole, triazole, and tetrazole on oxidized copper surfaces: $\text{Cu}_2\text{O}(111)$ and $\text{Cu}_2\text{O}(111)\text{-w/o-Cu}^{\text{CUS}}$

Dunja Gustinčič<sup>ab</sup> and Anton Kokalj<sup>\*a</sup>

Received Date  
Accepted Date

DOI: 10.1039/xxxxxxxxxx

www.rsc.org/journalname

## Supporting Information

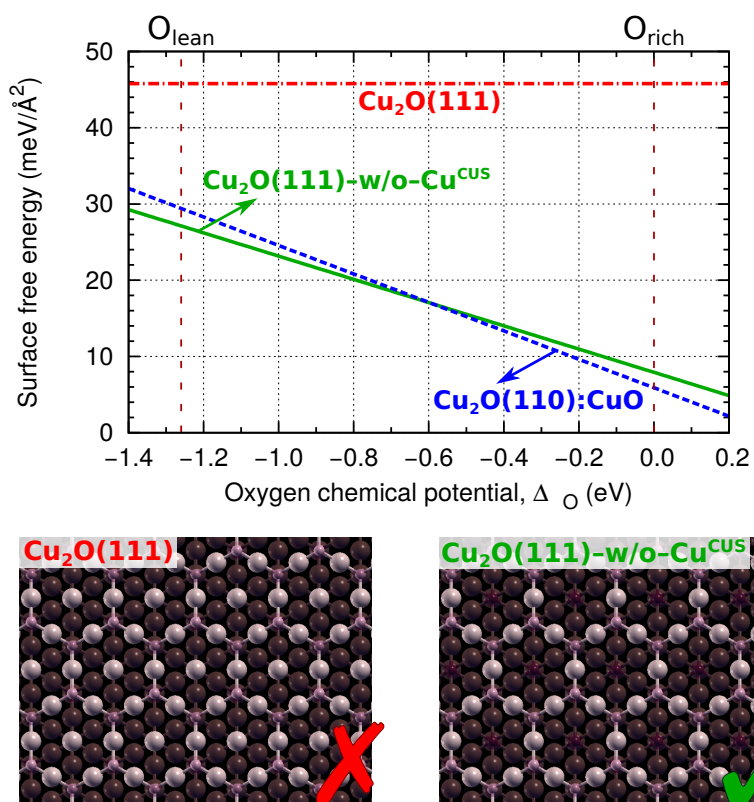

**Fig. S1** Top: calculated surface free energies for stoichiometric  $\text{Cu}_2\text{O}(111)$  and non-stoichiometric  $\text{Cu}_2\text{O}(111)\text{-w/o-Cu}^{\text{CUS}}$  and  $\text{Cu}_2\text{O}(110):\text{CuO}$  surfaces as a function of oxygen chemical potential. The two non-stoichiometric surfaces are considerably more stable than the  $\text{Cu}_2\text{O}(111)$ . Current results are in good agreement with those published previously by Soon et al.<sup>1</sup> Bottom: top view of  $\text{Cu}_2\text{O}(111)$  and  $\text{Cu}_2\text{O}(111)\text{-w/o-Cu}^{\text{CUS}}$  surfaces; the surface O–Cu–O trilayer is emphasized with pale color.

<sup>a</sup> Department of Physical and Organic Chemistry, Jožef Stefan Institute, Jamova 39, SI-1000 Ljubljana, Slovenia.

<sup>\*</sup> Fax: +386-1-251-93-85; Tel: +386-1-477-35-23; E-mail: [tone.kokalj@ijs.si](mailto:tone.kokalj@ijs.si); URL: <http://www.ijs.si/tjsw/K3-en/Kokalj>

<sup>b</sup> University of Ljubljana, Faculty of Chemistry and Chemical Technology, Večna pot 113, SI-1000 Ljubljana, Slovenia.

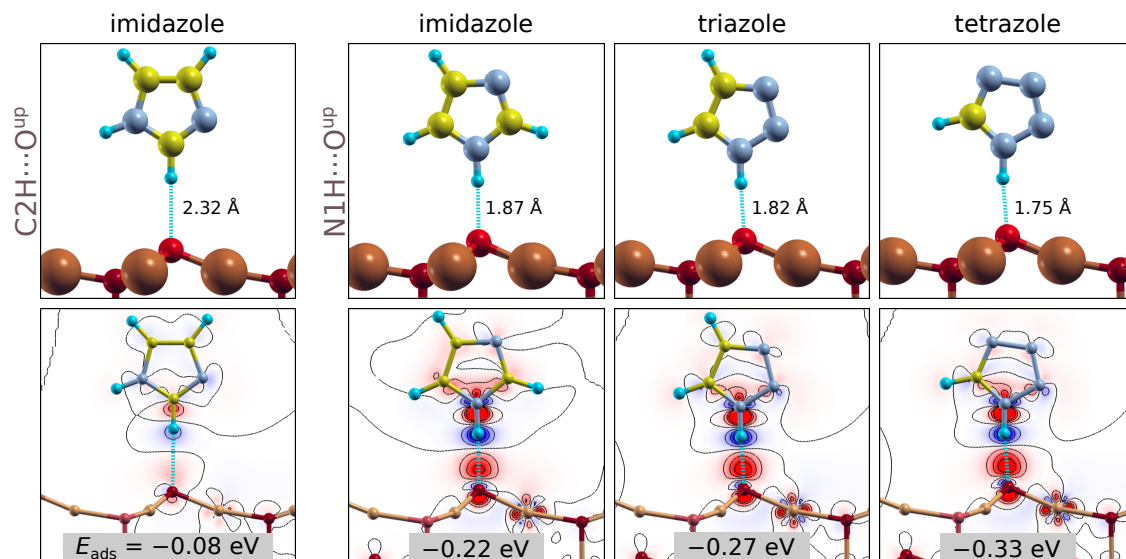

**Fig. S2** Top panels display the optimized structures of imidazole, triazole, and tetrazole bonded to  $O^{\text{up}}$  site on  $\text{Cu}_2\text{O}(111)\text{-w/o-Cu}^{\text{CUS}}$  via the *top-down* hydrogen bond. Left panel shows the  $\text{C2H}\cdots\text{O}^{\text{up}}$  bonding of imidazole, whereas the three panels on the right display the  $\text{N1H}\cdots\text{O}^{\text{up}}$  bonding of each molecule. Bottom panels display the electron charge density difference,  $\Delta\rho(\mathbf{r})$ , of these structures; seven contours are drawn in linear scale from  $-0.006$  to  $+0.006$   $e/a_0^3$  and electron charge flows from blue to red regions. A larger charge redistribution of the  $\text{N1H}\cdots\text{O}^{\text{up}}$  bonds compared to the  $\text{C2H}\cdots\text{O}^{\text{up}}$  bond clearly indicates that the former bonds are stronger than the latter bond, which is consistent with the respective shorter bond distances as well as stronger interaction energies, which are also stated.

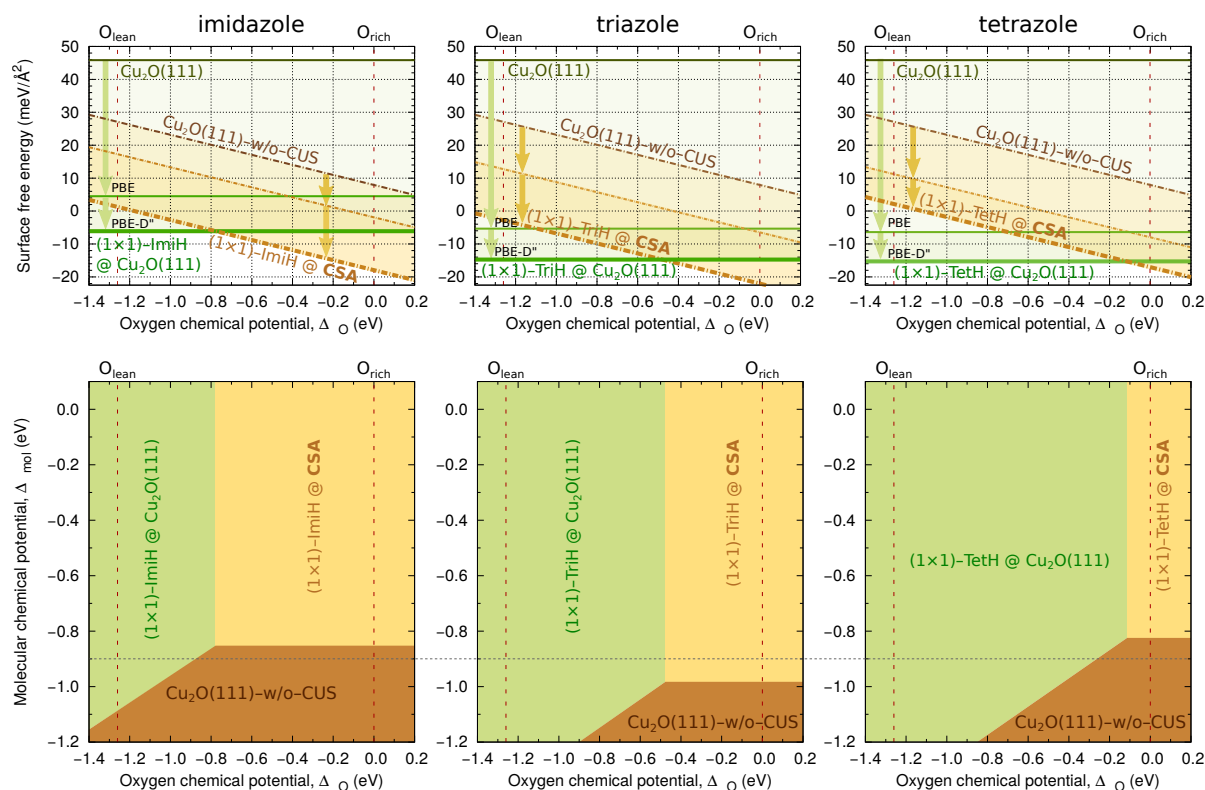

**Fig. S3** Adsorption phase diagrams of imidazole (left), triazole (middle), and tetrazole (right) on considered  $\text{Cu}_2\text{O}$  surfaces as calculated by the PBE-D" functional. Top row: surface free energies,  $\gamma_{\text{surf}}$ , of  $\text{Cu}_2\text{O}(111)$  and  $\text{Cu}_2\text{O}(111)\text{-w/o-Cu}^{\text{CUS}}$  and their stabilization due to high coverage molecular adsorption. For a given surface the upper  $\gamma_{\text{surf}}$  line corresponds to a bare surface and the middle and bottom lines to a molecularly covered surface, *i.e.*, middle line corresponds to PBE and bottom line to PBE-D" calculated stabilization; this stabilization is also indicated by two consecutive vertical arrows (the bottom one represents the stabilization due to dispersion correction). Bottom row: two dimensional phase diagrams as a function of molecular and oxygen chemical potentials. Beware that  $\Delta\mu_{\text{mol}}$  range is expanded downward with respect to the Fig. 5 in the manuscript (thin dashed line indicates the lower bound of  $\Delta\mu_{\text{mol}}$  range in Fig. 5).

## References

- 1 A. Soon, M. Todorova, B. Delley and C. Stampfl, *Phys. Rev. B*, 2007, **75**, 125420.
